# Supplementary material
Source: HighWire-hosted journal article supplement (http://qualitysafety.bmj.com/highwire/filestream/161929/field_highwire_adjunct_files/1/bmjqs-2021-013514supp002_data_supplement.pdf)
Supplement: bmjqs-2021-013514supp002_data_supplement.pdf [file bmjqs-2021-013514supp002_data_supplement.pdf]

## Supplementary 2 – SQUIRE checklist

# Reporting checklist for quality improvement in health care.

Based on the SQUIRE guidelines.

|                     | Reporting Item                                                                                                                                                                                                                                      | Page Number<br>[refers to<br>submission<br>document, not<br>published<br>document] |
|---------------------|-----------------------------------------------------------------------------------------------------------------------------------------------------------------------------------------------------------------------------------------------------|------------------------------------------------------------------------------------|
| <b>Title</b>        |                                                                                                                                                                                                                                                     |                                                                                    |
|                     | <a href="#">#1</a> Indicate that the manuscript concerns an initiative to improve healthcare (broadly defined to include the quality, safety, effectiveness, patientcenteredness, timeliness, cost, efficiency, and equity of healthcare)           | Title page                                                                         |
| <b>Abstract</b>     |                                                                                                                                                                                                                                                     |                                                                                    |
|                     | <a href="#">#02a</a> Provide adequate information to aid in searching and indexing                                                                                                                                                                  | Abstract (0)                                                                       |
|                     | <a href="#">#02b</a> Summarize all key information from various sections of the text using the abstract format of the intended publication or a structured summary such as: background, local problem, methods, interventions, results, conclusions | Abstract (0)                                                                       |
| <b>Introduction</b> |                                                                                                                                                                                                                                                     |                                                                                    |
| Problem description | <a href="#">#3</a> Nature and significance of the local problem                                                                                                                                                                                     | 1=                                                                                 |
| Available knowledge | <a href="#">#4</a> Summary of what is currently known about the problem, including relevant previous studies                                                                                                                                        | 2-3                                                                                |
| Rationale           | <a href="#">#5</a> Informal or formal frameworks, models, concepts, and / or theories used to explain the problem, any                                                                                                                              | 2-3                                                                                |

## Supplementary 2 – SQUIRE checklist

|                              |                      |                                                                                                                                                                                         |      |
|------------------------------|----------------------|-----------------------------------------------------------------------------------------------------------------------------------------------------------------------------------------|------|
|                              |                      | reasons or assumptions that were used to develop the intervention(s), and reasons why the intervention(s) was expected to work                                                          |      |
| Specific aims                | <a href="#">#6</a>   | Purpose of the project and of this report                                                                                                                                               | 3    |
| <b>Methods</b>               |                      |                                                                                                                                                                                         |      |
| Context                      | <a href="#">#7</a>   | Contextual elements considered important at the outset of introducing the intervention(s)                                                                                               | 3    |
| Intervention(s)              | <a href="#">#08a</a> | Description of the intervention(s) in sufficient detail that others could reproduce it                                                                                                  | 4    |
| Intervention(s)              | <a href="#">#08b</a> | Specifics of the team involved in the work                                                                                                                                              | 3    |
| Study of the Intervention(s) | <a href="#">#09a</a> | Approach chosen for assessing the impact of the intervention(s)                                                                                                                         | 5-6  |
| Study of the Intervention(s) | <a href="#">#09b</a> | Approach used to establish whether the observed outcomes were due to the intervention(s)                                                                                                | 5-6  |
| Measures                     | <a href="#">#10a</a> | Measures chosen for studying processes and outcomes of the intervention(s), including rationale for choosing them, their operational definitions, and their validity and reliability    | 6-8  |
| Measures                     | <a href="#">#10b</a> | Description of the approach to the ongoing assessment of contextual elements that contributed to the success, failure, efficiency, and cost                                             | 7-8  |
| Measures                     | <a href="#">#10c</a> | Methods employed for assessing completeness and accuracy of data                                                                                                                        | 7    |
| Analysis                     | <a href="#">#11a</a> | Qualitative and quantitative methods used to draw inferences from the data                                                                                                              | 8-10 |
| Analysis                     | <a href="#">#11b</a> | Methods for understanding variation within the data, including the effects of time as a variable                                                                                        | 8    |
| Ethical considerations       | <a href="#">#12</a>  | Ethical aspects of implementing and studying the intervention(s) and how they were addressed, including, but not limited to, formal ethics review and potential conflict(s) of interest | 9    |

**Results**

## Supplementary 2 – SQUIRE checklist

|                   |                      |                                                                                                                                                                                         |               |
|-------------------|----------------------|-----------------------------------------------------------------------------------------------------------------------------------------------------------------------------------------|---------------|
|                   | <a href="#">#13a</a> | Initial steps of the intervention(s) and their evolution over time (e.g., time-line diagram, flow chart, or table), including modifications made to the intervention during the project | Fig 4, S4, S5 |
|                   | <a href="#">#13b</a> | Details of the process measures and outcome                                                                                                                                             | 17-18         |
|                   | <a href="#">#13c</a> | Contextual elements that interacted with the intervention(s)                                                                                                                            | N/A           |
|                   | <a href="#">#13d</a> | Observed associations between outcomes, interventions, and relevant contextual elements                                                                                                 | 9-16          |
|                   | <a href="#">#13e</a> | Unintended consequences such as unexpected benefits, problems, failures, or costs associated with the intervention(s).                                                                  | N/A           |
|                   | <a href="#">#13f</a> | Details about missing data                                                                                                                                                              | N/A           |
| <b>Discussion</b> |                      |                                                                                                                                                                                         |               |
| Summary           | <a href="#">#14a</a> | Key findings, including relevance to the rationale and specific aims                                                                                                                    | 18            |
| Summary           | <a href="#">#14b</a> | Particular strengths of the project                                                                                                                                                     | 18            |
| Interpretation    | <a href="#">#15a</a> | Nature of the association between the intervention(s) and the outcomes                                                                                                                  | 18            |
| Interpretation    | <a href="#">#15b</a> | Comparison of results with findings from other publications                                                                                                                             | 18-19         |
| Interpretation    | <a href="#">#15c</a> | Impact of the project on people and systems                                                                                                                                             | 18-21         |
| Interpretation    | <a href="#">#15d</a> | Reasons for any differences between observed and anticipated outcomes, including the influence of context                                                                               | 21            |
| Interpretation    | <a href="#">#15e</a> | Costs and strategic trade-offs, including opportunity costs                                                                                                                             | N/A           |
| Limitations       | <a href="#">#16a</a> | Limits to the generalizability of the work                                                                                                                                              | 23            |
| Limitations       | <a href="#">#16b</a> | Factors that might have limited internal validity such as confounding, bias, or imprecision in the design, methods, measurement, or analysis                                            | 19-21         |

*Supplementary 2 – SQUIRE checklist*

|                          |                      |                                                                                                                                                     |       |
|--------------------------|----------------------|-----------------------------------------------------------------------------------------------------------------------------------------------------|-------|
| Limitations              | <a href="#">#16c</a> | Efforts made to minimize and adjust for limitations                                                                                                 | 19-21 |
| Conclusion               | <a href="#">#17a</a> | Usefulness of the work                                                                                                                              | 21    |
| Conclusion               | <a href="#">#17b</a> | Sustainability                                                                                                                                      | 21    |
| Conclusion               | <a href="#">#17c</a> | Potential for spread to other contexts                                                                                                              | 21    |
| Conclusion               | <a href="#">#17d</a> | Implications for practice and for further study in the field                                                                                        | 21    |
| Conclusion               | <a href="#">#17e</a> | Suggested next steps                                                                                                                                | 21    |
| <b>Other information</b> |                      |                                                                                                                                                     |       |
| Funding                  | <a href="#">#18</a>  | Sources of funding that supported this work. Role, if any, of the funding organization in the design, implementation, interpretation, and reporting | 29-30 |

None The SQUIRE 2.0 checklist is distributed under the terms of the Creative Commons Attribution License CC BY-NC 4.0. This checklist can be completed online using <https://www.goodreports.org/>, a tool made by the [EQUATOR Network](#) in collaboration with [Penelope.ai](#)
